# Supplementary material for: Optimizing TPA of Preserved Egg Gel with Sensory-Structural Validation
Source: Research Square preprint supplement (doi:10.21203/rs.3.rs-7554913/v1), 2025-10-01
Supplement: Supplementary file 1 [file c072058094f4a8bad1c232c0.docx]

Table S1 Information on Ten varieties of Commercially Available Preserved Eggs

| Sample | Origin | Sample | Origin |
| --- | --- | --- | --- |
| PE-1 | Xiaogan, Hubei | PE-6 | Jiangmen, Guangdong |
| PE-2 | Yangzhou, Jiangsu | PE-7 | Jiaxing, Zhejiang |
| PE-3 | Nanning, Guangxi | PE-8 | Nanchang, Jiangxi |
| PE-4 | Nantong, Jiangsu | PE-9 | Xuancheng, Jiangxi |
| PE-5 | Suizhou, Hubei | PE-10 | Yangzhou, Jiangsu |

| Table S2 Sensory evaluation of preserved egg white gel | | |
| --- | --- | --- |
| Evaluation Indicator | Evaluation Criteria | Score |
| Elasticity  (30 points) | Gently tap the ends of the egg and feel its elasticity. There is a noticeable vibration, and the gel immediately springs back when pressed | 21-30 |
| Gently tap the ends of the egg and feel its elasticity. There is a slight vibration, and the gel springs back moderately when pressed | 11-20 |
| Gently tap the ends of the egg and feel its elasticity. There is no vibration, and the gel does not spring back when pressed | 0-10 |
| Hardness  (50 points) | Press the gel; the gel maintains its shape well. When cut, the gel has moderate hardness and does not deform easily | 36-50 |
| Press the gel; the gel maintains its shape relatively well. When cut, the gel deforms slightly | 16-35 |
| Press the gel; the gel is fragile. When cut, the gel is soft and deforms easily | 0-15 |
| Chewiness  (20 points) | The gel is soft and chewy, neither sticky nor dry when chewed | 15-20 |
| The gel has some elasticity and resilience when chewed, but is not difficult to chew | 6-14 |
| The gel breaks easily and is too soft when chewed. | 0-5 |

| Table S3 Statistical table of composition information of preserved egg quality | | | |
| --- | --- | --- | --- |
| Dimensionality of Principal Components | Eigenvalue | Variance contribution rate /% | Cumulative Variance Explained /% |
| 1 | 3.881 | 97.027 | 97.027 |
| 2 | 0.112 | 2.794 | 99.821 |
| 3 | 0.006 | 0.162 | 99.983 |
| 4 | 0.001 | 0.017 | 100.000 |

| Table S4 Statistical table of principal component information of preserved egg gel structure | | | |
| --- | --- | --- | --- |
| Dimensionality of Principal Components | eigenvalue | Variance contribution rate /% | Cumulative Variance Explained /% |
| 1 | 6.416 | 80.200 | 80.200 |
| 2 | 0.747 | 9.341 | 89.541 |
| 3 | 0.497 | 6.213 | 95.754 |
| 4 | 0.226 | 2.822 | 98.576 |
| 5 | 0.070 | 0.874 | 99.449 |
| 6 | 0.033 | 0.415 | 99.864 |
| 7 | 0.011 | 0.135 | 99.999 |
| 8 | 0.000 | 0.001 | 100.000 |
